# Supplementary material for: Auxin Transporter OsPIN1b, a Novel Regulator of Leaf Inclination in Rice (Oryza sativa L.)
Source: MDPI journal article supplement (doi:10.3390/plants12020409), 2023-01-15
Supplement: s1 [file s1]

## Supplementary Material

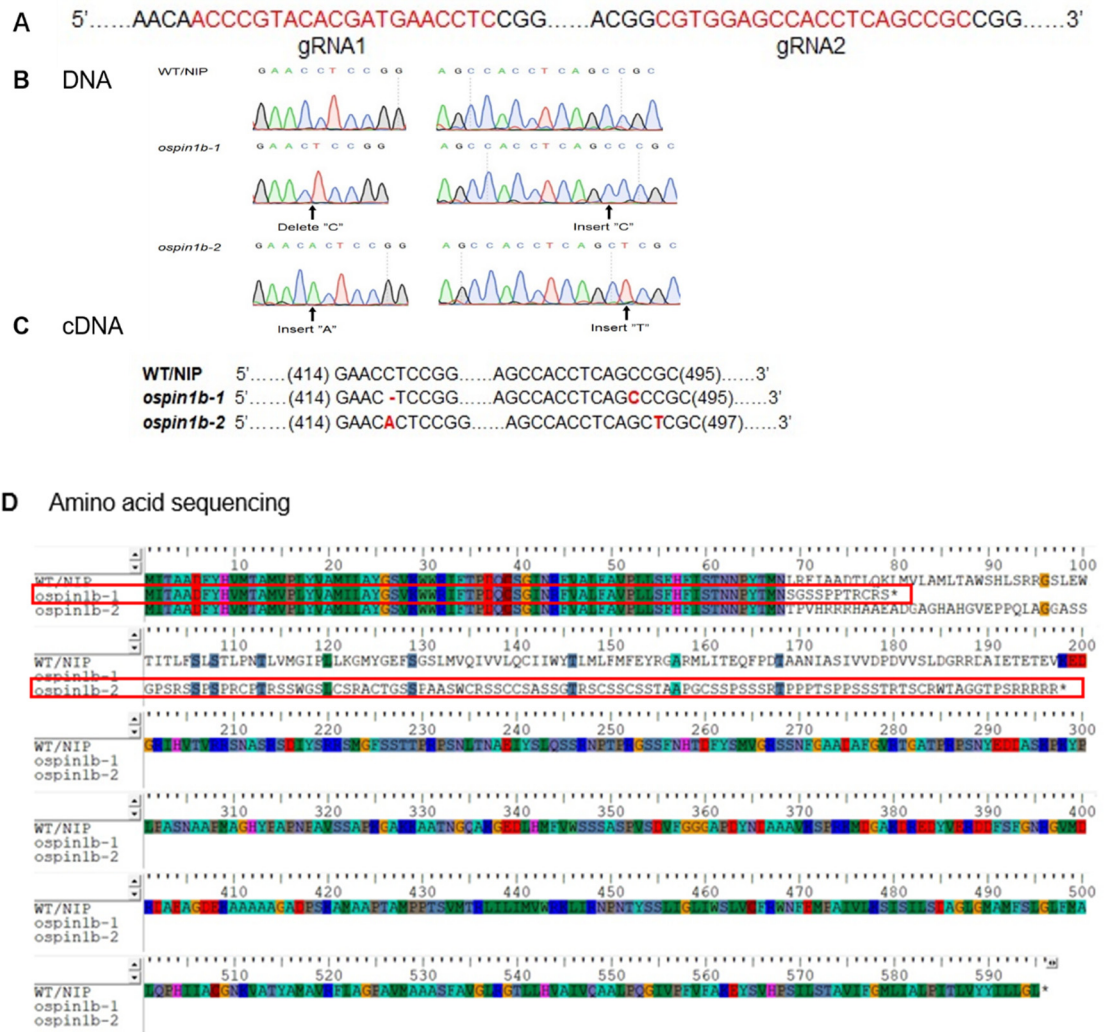

**Figure S1.** Construction of *ospin1b* mutants via CRISPR-Cas9 system. (A) Targeting sequence of gRNA1 or gRNA2. The red letters show targeting sequences. (B) DNA sequencing map of *OsPIN1b* gene in WT/NIP, *ospin1b-1* and *ospin1b-2*. Black arrows point at the insertion and deletion sites. (C) cDNA sequences of *OsPIN1b* gene in WT/NIP, *ospin1b-1* and *ospin1b-2*. The red letter indicates the inserted base, and the red dotted line indicates deleted base. (D) Amino acid sequences of *OsPIN1b* in WT/NIP, *ospin1b-1* and *ospin1b-2*. The red frames are used for marking the altered amino acid sites after CRISPR-Cas9 gene editing.

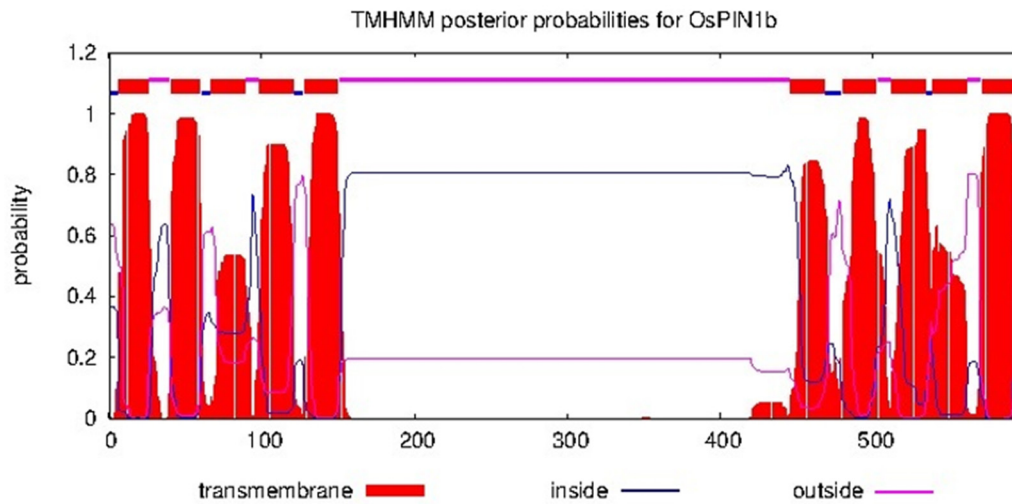

**Figure S2.** Structure analysis of OsPIN1b protein. Bioinformatic prediction of transmembrane region of OsPIN1b protein. The red rectangle, blue line and light purple line represent transmembrane, inside membrane, and outside membrane, respectively.

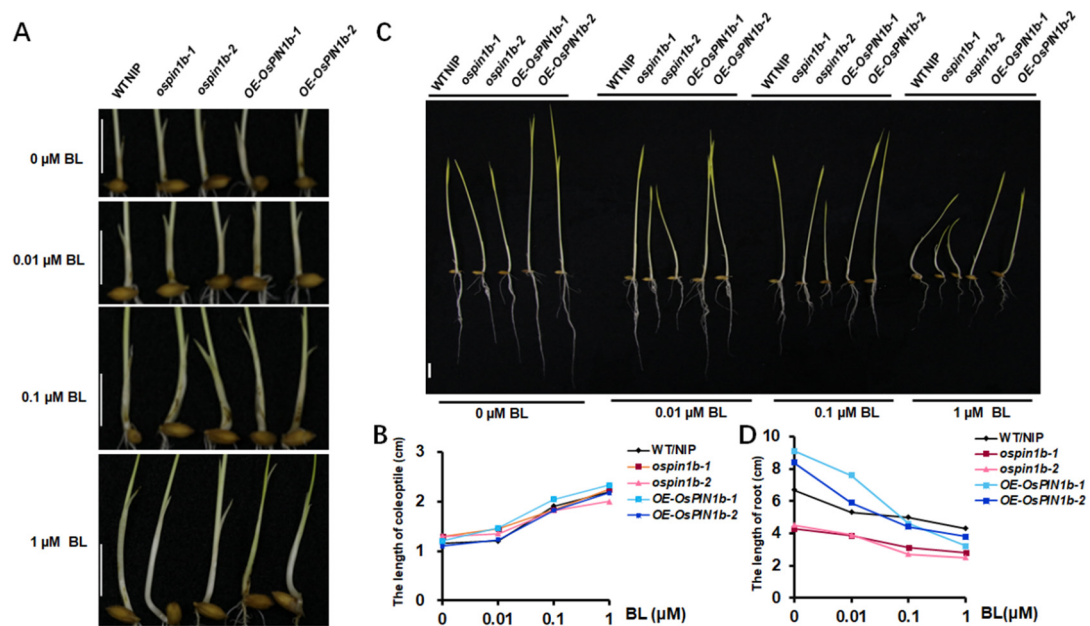

**Figure S3.** BR sensitivity tests. (A) Coleoptile response to 24-eBL treatment. The plant materials under each treatment were WT/NIP, *ospin1b-1*, *ospin1b-2*, OE-OsPIN1b-1, and OE-OsPIN1b-2 from left to right; The concentrations of 24-eBL from top to bottom were 0, 0.01, 0.1 and 1 μM, respectively. Scale bar = 1 cm. (B) statistical analysis of (A). The data are mean ± SD (n= 3). (C) Root response to 24-eBL treatment. Scale bar = 1 cm. (D) statistical analysis of (C). The data are mean ± SD (n= 3).

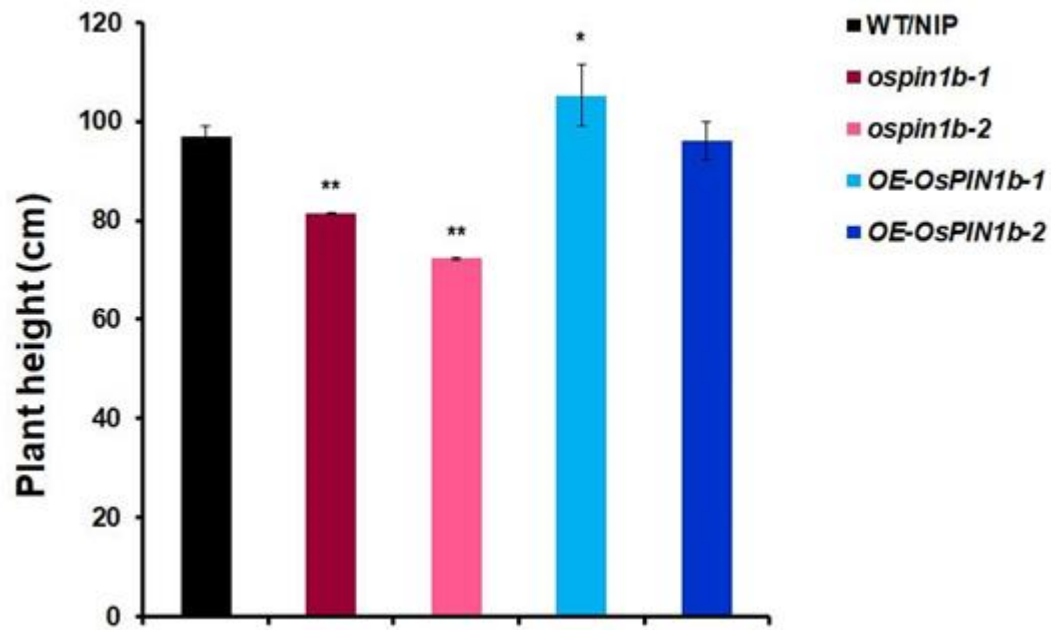

**Figure S4.** *OsPIN1b* positively regulates plant height. Statistics analysis of plant height of WT/NIP, *ospin1b* mutants and *OsPIN1b* over-expression lines for 4 months of seedling, respectively. The data are mean  $\pm$  SD (n= 10) and \* indicates the significant differences among WT/NIP, *ospin1b* mutants and OE-*OsPIN1b* over-expression lines (\* $p$  < 0.05, \*\* $p$  < 0.01; Student's *t*-test).

**Table S1.** Primers Used for Vector Construction.

| Primer name  | Primer sequence (from 5' to 3')                          |
|--------------|----------------------------------------------------------|
| 1b-gR1-FP    | TA GGTCTCC ACGATGAACCTC gtttagagctagaa                   |
| 1b-gR1-RP    | AT GGTCTCA TCGTGACGGGT tgcaccagccgggaa                   |
| 1b-gR2-FP    | TA GGTCTCC CACCTCAGCCGC gtttagagctagaa                   |
| 1b-gR2-RP    | AT GGTCTCA GGTGGCTCCACG tgcaccagccgggaa                  |
| L5AD5-FP     | CGGGTCTCAGGCAGGATGGGCAGTCTGGGCAACAAAGCACCAGTG<br>G       |
| L3AD5-RP     | TAGGTCTCCAAACGGATGAGCGACAGCAAACAAAAAAAAAAGCA<br>CCGACTCG |
| S5AD5-FP     | CG GGTCTCA GGCA GGATG GGCAGTCTG GGCA                     |
| S3AD5-RP     | TA GGTCTCC AAAC GGATG AGCGACAGC AAAC                     |
| UGW-FP       | GACCATGATTACGCCAAGCTTAAGGAATCTTTAAACATACG                |
| UGW-RP       | GGACCTGCAGGCATGCACGCGCTAAAAACGGACTAGC                    |
| promoter u3  | TGGGTACGTTGGAAACCACG                                     |
| pUBI10       | GTTTGTTGGTCGCCGTTAGG                                     |
| 1b (1,2)-FP  | GTCGTTCCTCATCTCCA                                        |
| 1b (1,2)-RP  | CTCCCCGTACATGCCCTTG                                      |
| 1b-CDS-F     | gagctcgggtaccggggatccGGTACCATGATTACGGCGGCGGACTT          |
| 1b-CDS-R     | gctcaccatgtcgacTCTAGACAGCCCAAGCAAGATGTAGT                |
| 1b-over-FP   | TTCATGGCGCTGCAGCCGC                                      |
| 1b-over-RP   | TGTA CTCTTGGCGAAGACGA                                    |
| pro1b-GUS-FP | gtcgacCTCGCCATTTTTTAACTCGT                               |
| pro1b-GUS-RP | ggtaccCTTCGCCCCCCTCTT                                    |

**Table S2.** Primers Used for qRT-PCR Analysis.

| <b>Primer name</b> | <b>Primer sequence (from 5' to 3')</b> |
|--------------------|----------------------------------------|
| Actin-FP           | TGTATGCCAGTGGTCGTACCA                  |
| Actin-RP           | CCAGCAAGGTCGAGACGAA                    |
| OsPIN1b-RT-FP      | TGCACCCTAGCATTCTCAGCA                  |
| OsPIN1b-RT-RP      | CCCTCCTCCCAAATTCTACTTC                 |
| BRI1-RT-FP         | TACCAGAGCTTCAGATGCACCA                 |
| BRI1-RT-RP         | AGTAGCTCAGGGTCGAAGACAT                 |
| D2-RT-FP           | CCTTTTGGTGGTGGGCAGAG                   |
| D2-RT-RP           | TGGGGAAGTTGACGATGTGGT                  |
| D11-RT-FP          | TCATGGAAATGCCCAACAATT                  |
| D11-RT-RP          | CCGAACGGCGTAAACTTCTT                   |
| ARF19-RT-FP        | GTCCTACTGAATTTGTTATC                   |
| ARF19-RT-RP        | CAGATAGAAACCCTATTTTCG                  |
| IAA1-RT-FP         | CTCGACTTCGAGGACACCGC                   |
| IAA1-RT-RP         | GATGGTGAAGTGCGAGAAGAAC                 |
